# 1     **Deducing the Dose-response Relation for Coronaviruses from COVID-19,** 2                                   **SARS and MERS Meta-analysis Results**

3                                   Xiaole Zhang<sup>1,2</sup>, Jing Wang<sup>1,2\*</sup>

4     1.   Institute of Environmental Engineering (IfU), ETH Zürich, Zürich, CH-8093, Switzerland

5     2.   Laboratory for Advanced Analytical Technologies, Empa, Dübendorf, CH-8600, Switzerland

6     \* Corresponding author: Prof. Dr. Jing Wang; e-mail address: [jing.wang@ifu.baug.ethz.ch](mailto:jing.wang@ifu.baug.ethz.ch)

## 8     **Abstract**

9     The fundamental dose-response relation is still missing for better evaluating and controlling the  
10    transmission risk of COVID-19. A recent study by Chu et al. has indicated that the anticipated  
11    probability of viral infection is about 12.8% within 1 m and about 2.6% at further distance through a  
12    systematic review and meta-analysis. This important information provides us a unique opportunity to  
13    assess the dose-response relation of the viruses, if reasonable exposure dose could be estimated. Here  
14    we developed a simple framework to integrate the *a priori* dose-response relation for SARS-CoV based  
15    on mice experiments, and the recent data on infection risk and viral shedding, to shed light on the dose-  
16    response relation for human. The developed dose-response relation is an exponential function with a  
17    constant  $k$  in the range of  $6.19 \times 10^4$  to  $7.28 \times 10^5$  virus copies. The result mean that the infection risk  
18    caused by one virus copy in viral shedding is about  $1.5 \times 10^{-6}$  to  $1.6 \times 10^{-5}$ . The developed dose-response  
19    relation provides a tool to quantify the magnitude of the infection risk.

20

21 Control of the spread of Corona Virus Disease 2019 (COVID-19) is the urgent challenge throughout  
22 the world. It is considered that the causal pathogen, severe acute respiratory syndrome coronavirus 2  
23 (SARS-CoV-2), could spread via the transmission of virus-laden respiratory particles shed from  
24 infected individuals <sup>1</sup>. However the fundamental dose-response relation is still missing for better  
25 evaluating and controlling the transmission risk of the disease.

26  
27 A recent study by Chu et al. <sup>2</sup> has indicated that the anticipated probability of viral infection is about  
28 12.8% within 1 m and about 2.6% at further distance through a systematic review and meta-analysis  
29 on the betacoronaviruses causing severe acute respiratory syndrome (SARS), Middle East Respiratory  
30 Syndrome (MERS) and COVID-19. This important information provides us a unique opportunity to  
31 assess the dose-response relation of the viruses, if reasonable exposure dose could be estimated. Here  
32 we developed a simple framework to integrate the *a priori* dose-response relation for SARS-CoV <sup>3</sup>  
33 based on mice experiments, and the recent data on infection risk <sup>2</sup> and viral shedding <sup>4</sup>, to shed light  
34 on the dose-response relation for human.

35  
36 Watanabe et al. <sup>3</sup> found that the exponential model  $p=1-\exp(-d/k)$  could well depict the dose-response  
37 relation based on the experiments challenging mice with recombinant SARS-CoV variants <sup>5</sup> and  
38 Murine Coronavirus Strain 1 (MHV-1) <sup>6</sup>, where  $p$  is the infection probability,  $d$  is the exposure dose,  
39 and  $k$  is the pathogen dependent parameter. With a little mathematics, we could derive that  $p \sim d/k$ ,  
40 when the infection risk is below 15%, with the difference between  $p$  and  $d/k$  smaller than 8%. We  
41 assume that the exponential model remains applicable for the dose-response relation for human.

42  
43 Recently, Leung et al. <sup>4</sup> investigated the respiratory shedding of coronaviruses (NL63, OC43, HKU1  
44 and 229E) in exhaled breath in real-life situations with breathing and coughing. The results have shown  
45 that about 30% to 40% of the symptomatic individuals in the tests produced viral shedding ( $E_{virus}$ ) in

46 respiratory particles, with about  $10^2$  to  $10^5$  virus copies in samples of 30 min without wearing masks,  
47 with a geometric mean of about  $10^4$ .

48

49 An overall effective dilution rate is required to convert the viral shedding into the exposure dose at  
50 various distances. The overall effective dilution rate should be a combination of various factors, e.g.  
51 the dilution when the exhaled air is mixed with the ambient air and the possibility for the exposed  
52 person to actually inhale the contaminated plume. The meta-analysis study <sup>2</sup> offered a plausible way  
53 to estimate this factor. It was shown that the chance of viral infection decreased by about a factor of 5  
54 from within 1 m (12.8%) to further distance (2.6%). According to the exponential model, the dose-  
55 response relation is nearly linear within the range of  $p < 15\%$  ( $k$  is a constant), which suggests that the  
56 viral shedding from an infected individual should also be effectively diluted by about the same  
57 magnitude. “Further distance” is likely within 2 or 3 meters considering the confined indoor space, so  
58 we use 5 times per meter as the effective dilution factor ( $f_{dilu}$ ) to estimate the exposure dose. It was  
59 reported in the meta-analysis <sup>2</sup> that the duration of exposure varied from any duration to a minimum  
60 of 1 h. Here we use 1 h as a representative duration ( $t_{expo}$ ), which is close to the total duration of close  
61 contact between a nurse / health worker and a patient per day <sup>7</sup>. The exposure (virus copies) at further  
62 distance was estimated as  $d = E_{virus} / (f_{dilu}) t_{expo}$ .

63

64 Monte Carlo simulations were conducted to estimate the exposure dose. Two different fractions (40%,  
65 100%) of the infected individuals for positive viral shedding ( $E_{virus}$ , virus copies per hour) and two  
66 distributions  $\log_{10}(E_{virus}) \sim Normal(4, 0.5)$  and  $\log_{10}(E_{virus}) \sim Uniform(3, 5)$ , namely four different  
67 combinations of the configurations were utilized to estimate the exposure dose and the corresponding  
68 dose-response relation, and to evaluate the sensitivities of the estimations to the configurations. One  
69 million values of  $E_{virus}$  were generated for each setting. The deposition of the particles in the respiratory  
70 system was estimated based on the size distribution <sup>8</sup> of particles generated by breathing and coughing

71 and the deposition model for bioaerosols<sup>9</sup>. The overall deposition ratio was about 90%. The dose-  
72 response relation was estimated based on 5 different contribution levels (0.1, 0.25, 0.5, 0.75 and 1) of  
73 airborne virus-laden particles to the total dose from both exposure to airborne viruses and contact  
74 transmission.

75

76 The final dose-response estimations for  $k$  are from  $6.19 \times 10^4$  to  $7.28 \times 10^5$  copies dependent on the  
77 contribution of the airborne virus-laden particles to the total dose as shown in appendix Figure 1 to 4.  
78 The variations among different configurations are limited, which suggests the stability of the  
79 estimations. The results mean that the infection risk caused by one virus copy in viral shedding is about  
80  $1.5 \times 10^{-6}$  to  $1.6 \times 10^{-5}$ . Watanabe et al. utilized the plaque-forming units (PFU) to quantify the dose. A  
81 previous study on SARS-CoV<sup>10</sup> showed that about 300 viral genome copies were present per PFU.  
82 Then  $k$  in the Watanabe model<sup>3</sup> was about  $1.23 \times 10^5$ , close to our estimation with 50% contribution  
83 from airborne particles to the total dose. The results suggest that the experiments based on mice could  
84 provide reasonable insight for the human infection risk. However, the conversion factor from PFU to  
85 virus copies is still uncertain and needs further evaluation.

86

87 The framework is kept as simple as possible to avoid unnecessary uncertainties. The developed dose-  
88 response relation provides a tool to quantify the magnitude of the infection risk and can be used in  
89 model assessment of the infection risk in specific cases<sup>11</sup>. The meta-analysis and evidence based study  
90 provide a new opportunity to estimate the human dose-response relation. In the future, the uncertainties  
91 could be reduced by using new technology, e.g. personal IoT (internet of things) devices, to record the  
92 distance, exposure duration, and environmental factors, which could greatly improve the quality of  
93 exposure dose estimation and thus the dose-response relation.

94

## 95    **References**

- 96    1    Santarpia, J. L. *et al.* Aerosol and Surface Transmission Potential of SARS-CoV-2. *medRxiv*,  
97        2020.2003.2023.20039446, doi:10.1101/2020.03.23.20039446 (2020).
- 98    2    Chu, D. K. *et al.* Physical distancing, face masks, and eye protection to prevent person-to-person transmission of  
99        SARS-CoV-2 and COVID-19: a systematic review and meta-analysis. *The Lancet*, doi:10.1016/s0140-  
100        6736(20)31142-9 (2020).
- 101    3    Watanabe, T., Bartrand, T. A., Weir, M. H., Omura, T. & Haas, C. N. Development of a Dose-Response Model for  
102        SARS Coronavirus. *Risk Analysis* **30**, 1129-1138, doi:10.1111/j.1539-6924.2010.01427.x (2010).
- 103    4    Leung, N. H. L. *et al.* Respiratory virus shedding in exhaled breath and efficacy of face masks. *Nature Medicine*,  
104        doi:10.1038/s41591-020-0843-2 (2020).
- 105    5    DeDiego, M. L. *et al.* Pathogenicity of severe acute respiratory coronavirus deletion mutants in hACE-2 transgenic  
106        mice. *Virology* **376**, 379-389, doi:https://doi.org/10.1016/j.virol.2008.03.005 (2008).
- 107    6    De Albuquerque, N. *et al.* Murine Hepatitis Virus Strain 1 Produces a Clinically Relevant Model of Severe Acute  
108        Respiratory Syndrome in A/J Mice. *Journal of Virology* **80**, 10382, doi:10.1128/jvi.00747-06 (2006).
- 109    7    Adhikari, U. *et al.* A Case Study Evaluating the Risk of Infection from Middle Eastern Respiratory Syndrome  
110        Coronavirus (MERS-CoV) in a Hospital Setting Through Bioaerosols. *Risk Analysis* **39**, 2608-2624,  
111        doi:10.1111/risa.13389 (2019).
- 112    8    Morawska, L. *et al.* Size distribution and sites of origin of droplets expelled from the human respiratory tract during  
113        expiratory activities. *Journal of Aerosol Science* **40**, 256-269, doi:https://doi.org/10.1016/j.jaerosci.2008.11.002  
114        (2009).
- 115    9    Guha, S., Hariharan, P. & Myers, M. R. Enhancement of ICRP's Lung Deposition Model for Pathogenic Bioaerosols.  
116        *Aerosol Science and Technology* **48**, 1226-1235, doi:10.1080/02786826.2014.975334 (2014).
- 117    10    Sampath, R. *et al.* Rapid identification of emerging pathogens: coronavirus. *Emerg Infect Dis* **11**, 373-379,  
118        doi:10.3201/eid1103.040629 (2005).
- 119    11    Zhang, X. *et al.* Infection risk assessment of COVID-19 through aerosol transmission: a case study of South China  
120        Seafood Market. *Environmental Science & Technology*, doi: 10.1021/acs.est.0c02895 (2020).

121

122

123

124 **Appendix**

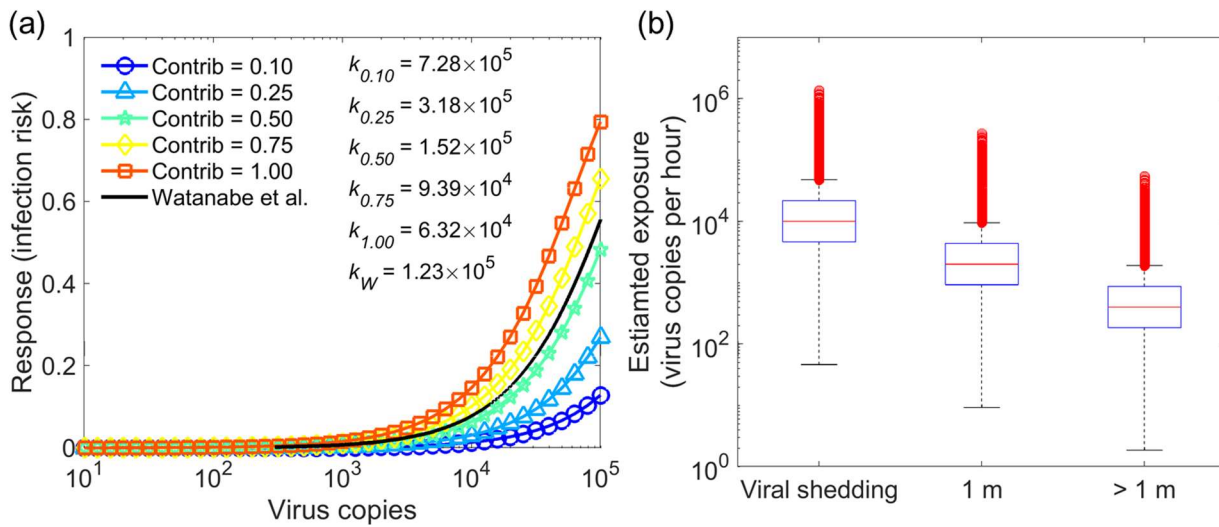

125

126 Figure 1 Log-normal distribution of viral shedding  $\log_{10}(E_{virus}) \sim Normal(4, 0.5)$ , with 40% positive viral  
 127 shedding. (a) The estimated dose-response relations based on the different contributions (0.1, 0.25, 0.5, 0.75  
 128 and 1) of the airborne virus-laden particles to the total dose from both exposure to airborne viruses and contact  
 129 transmission; (b) viral shedding and exposure dose for 1 hour duration, zero values are not shown in the figure.

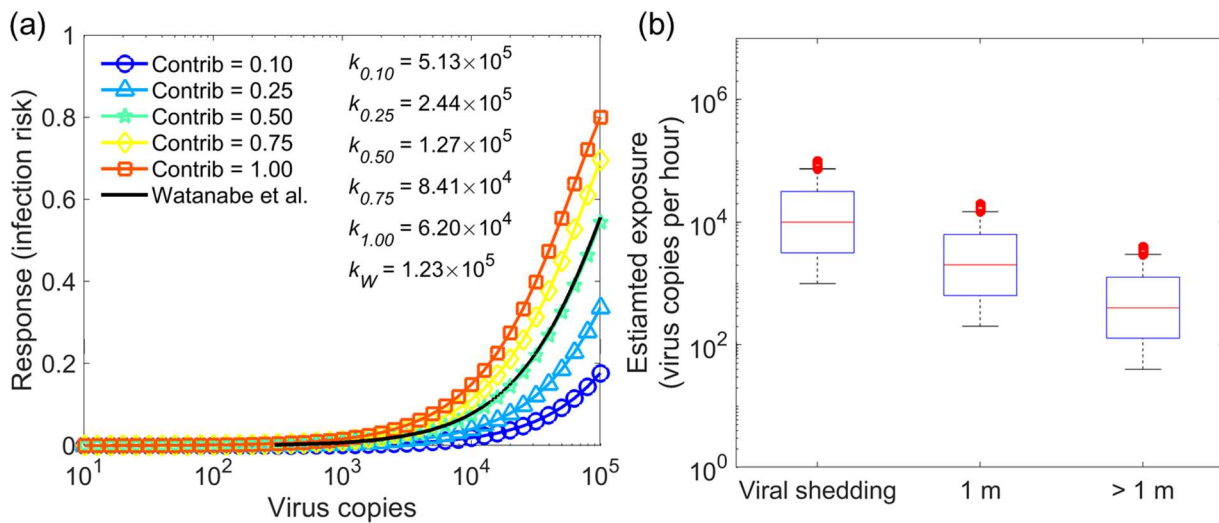

130

131 Figure 2 Log-uniform distribution of viral shedding  $\log_{10}(E_{virus}) \sim Uniform(3, 5)$ , with 40% positive viral  
 132 shedding. (a) The estimated dose-response relations based on the different contributions (0.1, 0.25, 0.5, 0.75  
 133 and 1) of the airborne virus-laden particles to the total dose from both exposure to airborne viruses and contact  
 134 transmission; (b) viral shedding and exposure dose for 1 hour duration, zero values are not shown in the figure.

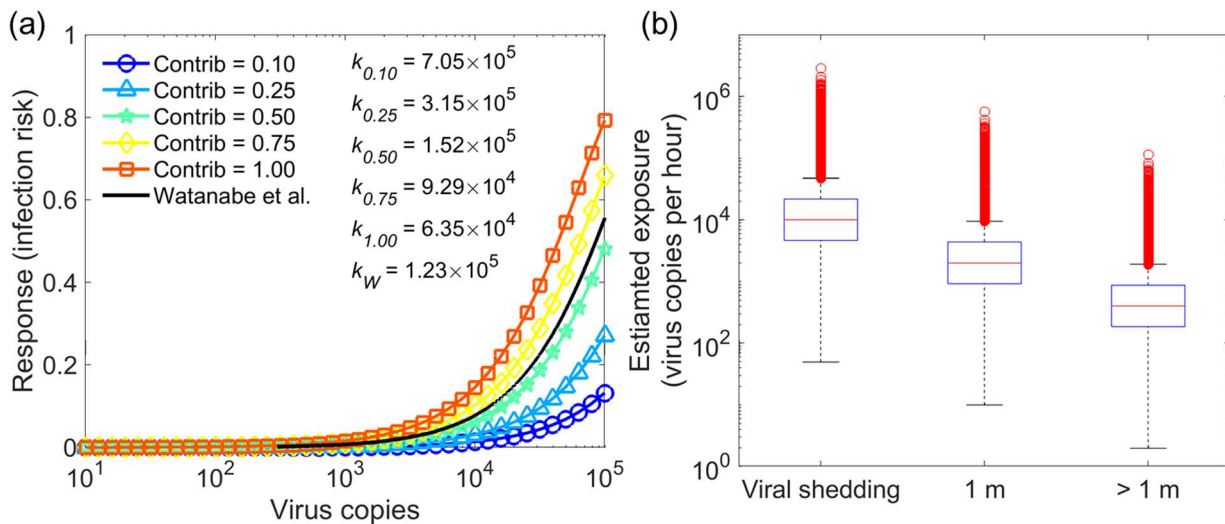

135

136 Figure 3 Log-normal distribution of viral shedding  $\log_{10}(E_{virus}) \sim Normal(4, 0.5)$ , with 100% positive viral  
 137 shedding. (a) The estimated dose-response relations based on the different contributions (0.1, 0.25, 0.5, 0.75  
 138 and 1) of the airborne virus-laden particles to the total dose from both exposure to airborne viruses and contact  
 139 transmission; (b) viral shedding and exposure dose for 1 hour duration, zero values are not shown in the figure.

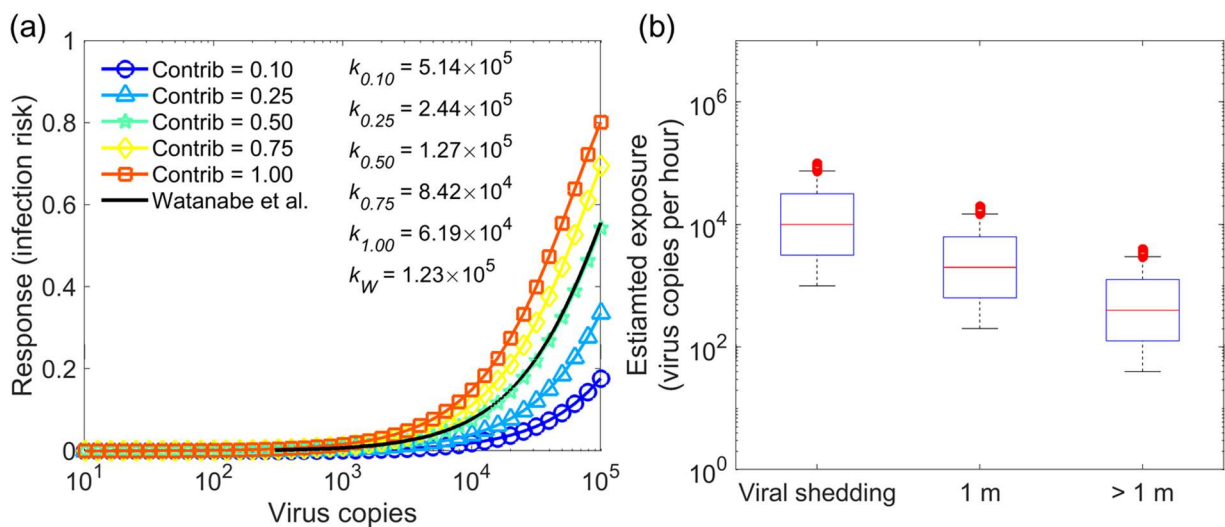

140

141 Figure 4 Log-uniform distribution of viral shedding  $\log_{10}(E_{virus}) \sim Uniform(3, 5)$ , with 100% positive viral  
 142 shedding. (a) The estimated dose-response relations based on the different contributions (0.1, 0.25, 0.5, 0.75  
 143 and 1) of the airborne virus-laden particles to the total dose from both exposure to airborne viruses and contact  
 144 transmission; (b) viral shedding and exposure dose for 1 hour duration, zero values are not shown in the figure.

145
